# Supplementary material for: Skin-inspired flexible and high-sensitivity pressure sensors based on rGO films with continuous-gradient wrinkles
Source: Royal Society of Chemistry journal article supplement (doi:10.1039/c8nr08503j), 2018-11-28
Supplement: c8nr08503j3.pdf [file c8nr08503j3.pdf]

## Supporting Information

# Skin-Inspired Flexible and High-Sensitivity Pressure Sensor Based on rGO Film with Continuous-Gradient Wrinkles

*Jin Jia, † Guotao Huang, † Jianping Deng, \*† and Kai Pan\*†*

†College of Materials Science and Engineering (CMSE), Beijing University of Chemical Technology,  
Chaoyang District North Third Ring Road 15, Beijing 100029, China

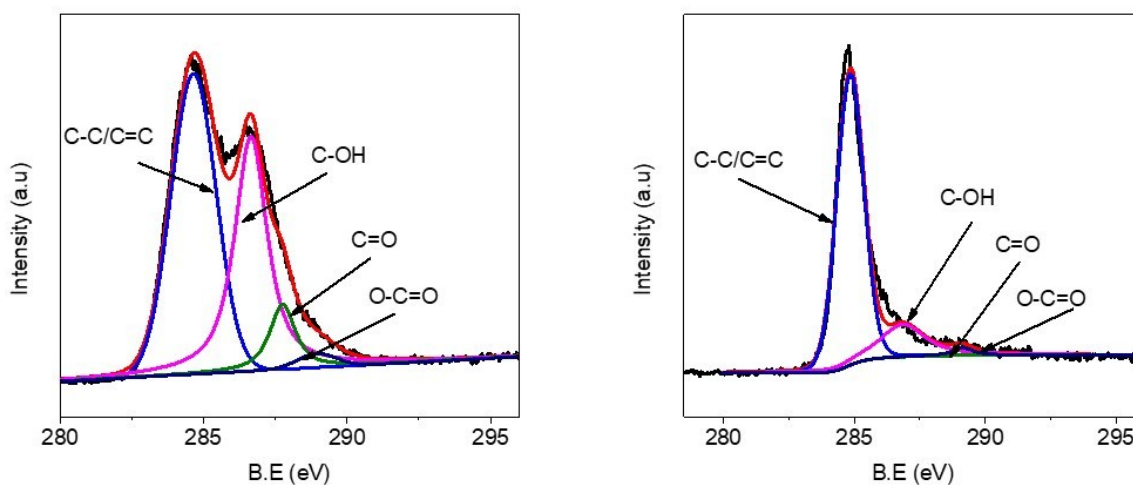

**Figure S1.** XPS spectra of GO (before reduction) and rGO (after reduction).

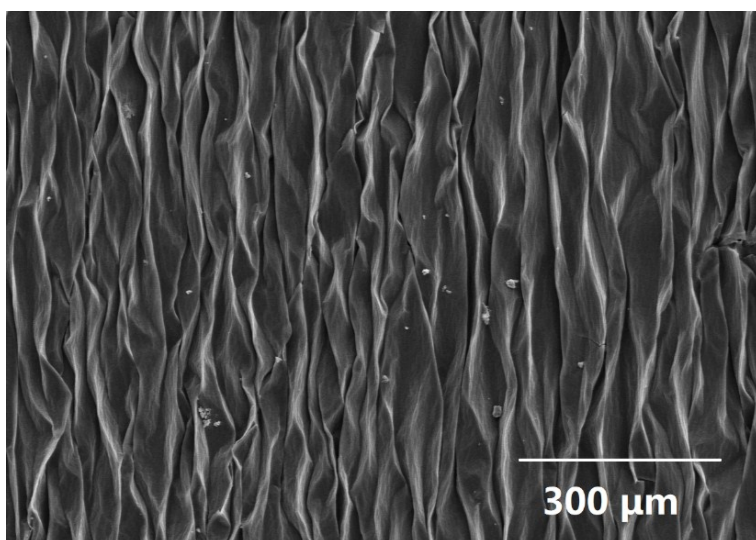

**Figure S2.** The SEM image of untreated GO film.

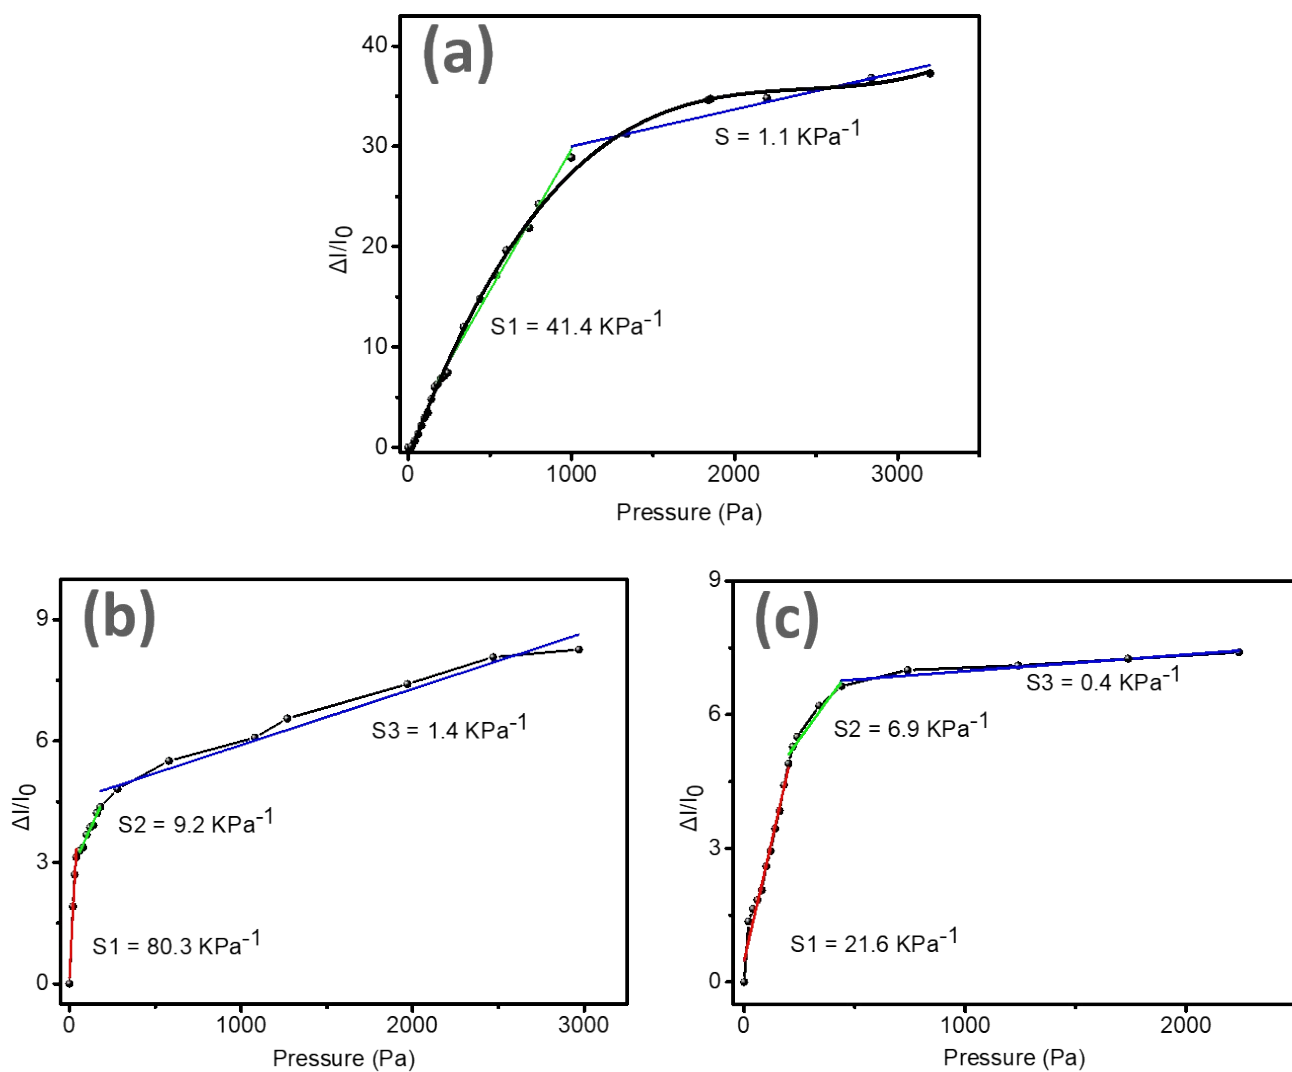

**Figure S3.** The sensitivity of the sensors at different pre-strain ratios, (a) 50%, (b) 83%, (c) 100%, respectively.

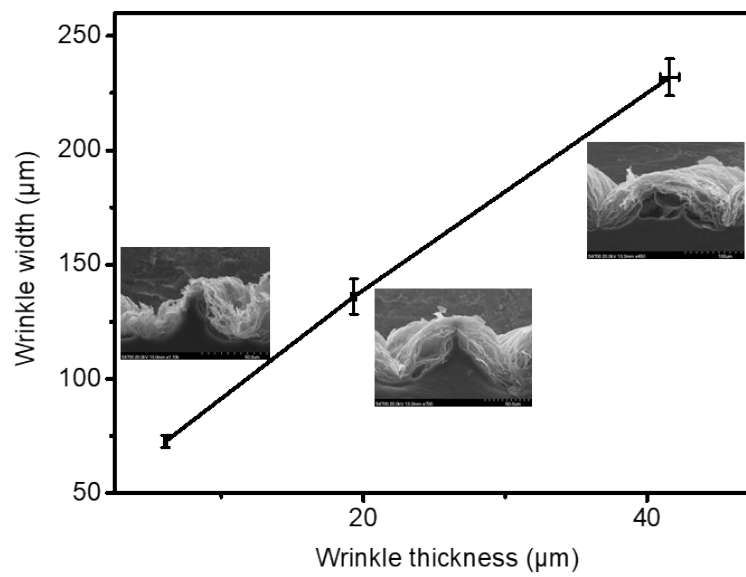

**Figure S4.** The size distribution of the wrinkles at three different locations

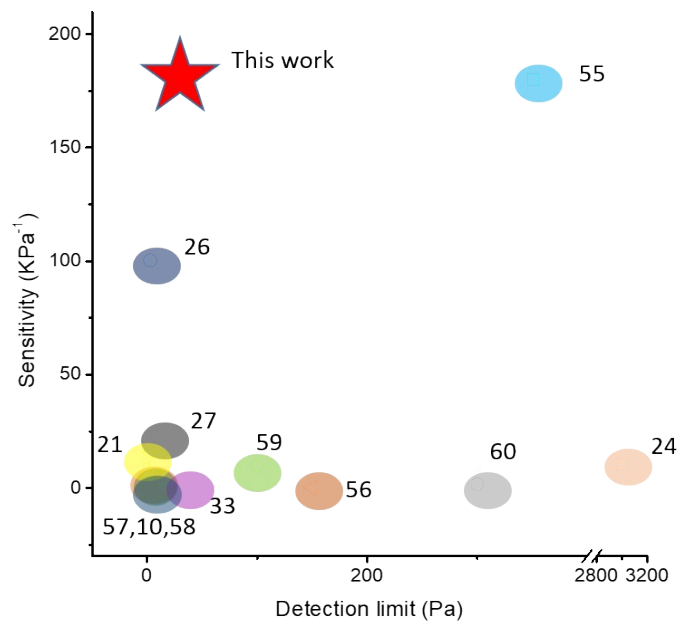

**Figure S5.** References of the sensitivity and detection limit.
